# Supplementary material
Source: PubMed Central journal article supplement (PMC3675229)
Supplement: mmc1.pdf [file mmc1.pdf]

## Supplemental Data

### Germline *BAP1* Mutations Predispose

#### to Renal Cell Carcinomas

Tatiana Popova, Lucie Hebert, Virginie Jacquemin, Sophie Gad, Virginie Caux-Moncoutier, Catherine Dubois-d’Enghien, Bénédicte Richaudeau, Xavier Renaudin, Jason Sellers, André Nicolas, Xavier Sastre-Garau, Laurence Desjardins, Gabor Gyapay, Virginie Raynal, Olga M. Sinilnikova, Nadine Andrieu, Elodie Manié, Antoine de Pauw, Paul Gesta, Valérie Bonadona, Christine Maugard, Clotilde Penet, Marie-Françoise Avril, Emmanuel Barillot, Odile Cabaret, Olivier Delattre, Stéphane Richard, Olivier Caron, Meriem Benfodda, Hui-Han Hu, Nadem Soufir, Brigitte Bressac-de-Paillerets, Dominique Stoppa-Lyonnet, and Marc-Henri Stern

#### Table of contents

##### Supplementary Figures

|                                                                                                                                                                |   |
|----------------------------------------------------------------------------------------------------------------------------------------------------------------|---|
| Figure S1. Delimitation of candidate predisposition gene region by tumor genome profiling and detection of Identical By Descent (IBD) regions in family A..... | 3 |
| Figure S2. <i>BAP1</i> mutation analysis in family A .....                                                                                                     | 4 |
| Figure S3. Splicing effect of <i>BAP1</i> mutation by minigene transcript analysis.....                                                                        | 5 |
| Figure S4. Immunohistochemistry for <i>BAP1</i> expression in breast tumors from family A.....                                                                 | 6 |

##### Supplementary Tables

|                                                                                                                         |    |
|-------------------------------------------------------------------------------------------------------------------------|----|
| Table S1. Summary of whole exome sequencing in family A.....                                                            | 7  |
| Table S2. Unknown non-synonymous single nucleotide variants (SNVs) common for family A III-1 and III-5 relatives .....  | 8  |
| Table S3. Unknown indel leading to frameshift in coding regions in family A .....                                       | 9  |
| Table S4. Identical by descent (IBD) regions and cancers in family A .....                                              | 10 |
| Table S5. Rare non-synonymous single nucleotide polymorphisms (SNPs) common for family A III-1 and III-5 relatives..... | 11 |
| Table S6. Clinical characteristics of the familial renal cell carcinoma (RCC) cohort .....                              | 12 |
| Table S7. Primers used for <i>BAP1</i> screening and sequencing .....                                                   | 14 |
| Table S8. Clinical characteristics of familial cases with UM, MPM or CM.....                                            | 15 |
| Table S9. Clinical characteristics of families carrying a <i>BAP1</i> deleterious mutation.....                         | 18 |
| Table S10. Estimation of lifetime risk for RCC in <i>BAP1</i> mutated families .....                                    | 20 |
| References.....                                                                                                         | 20 |

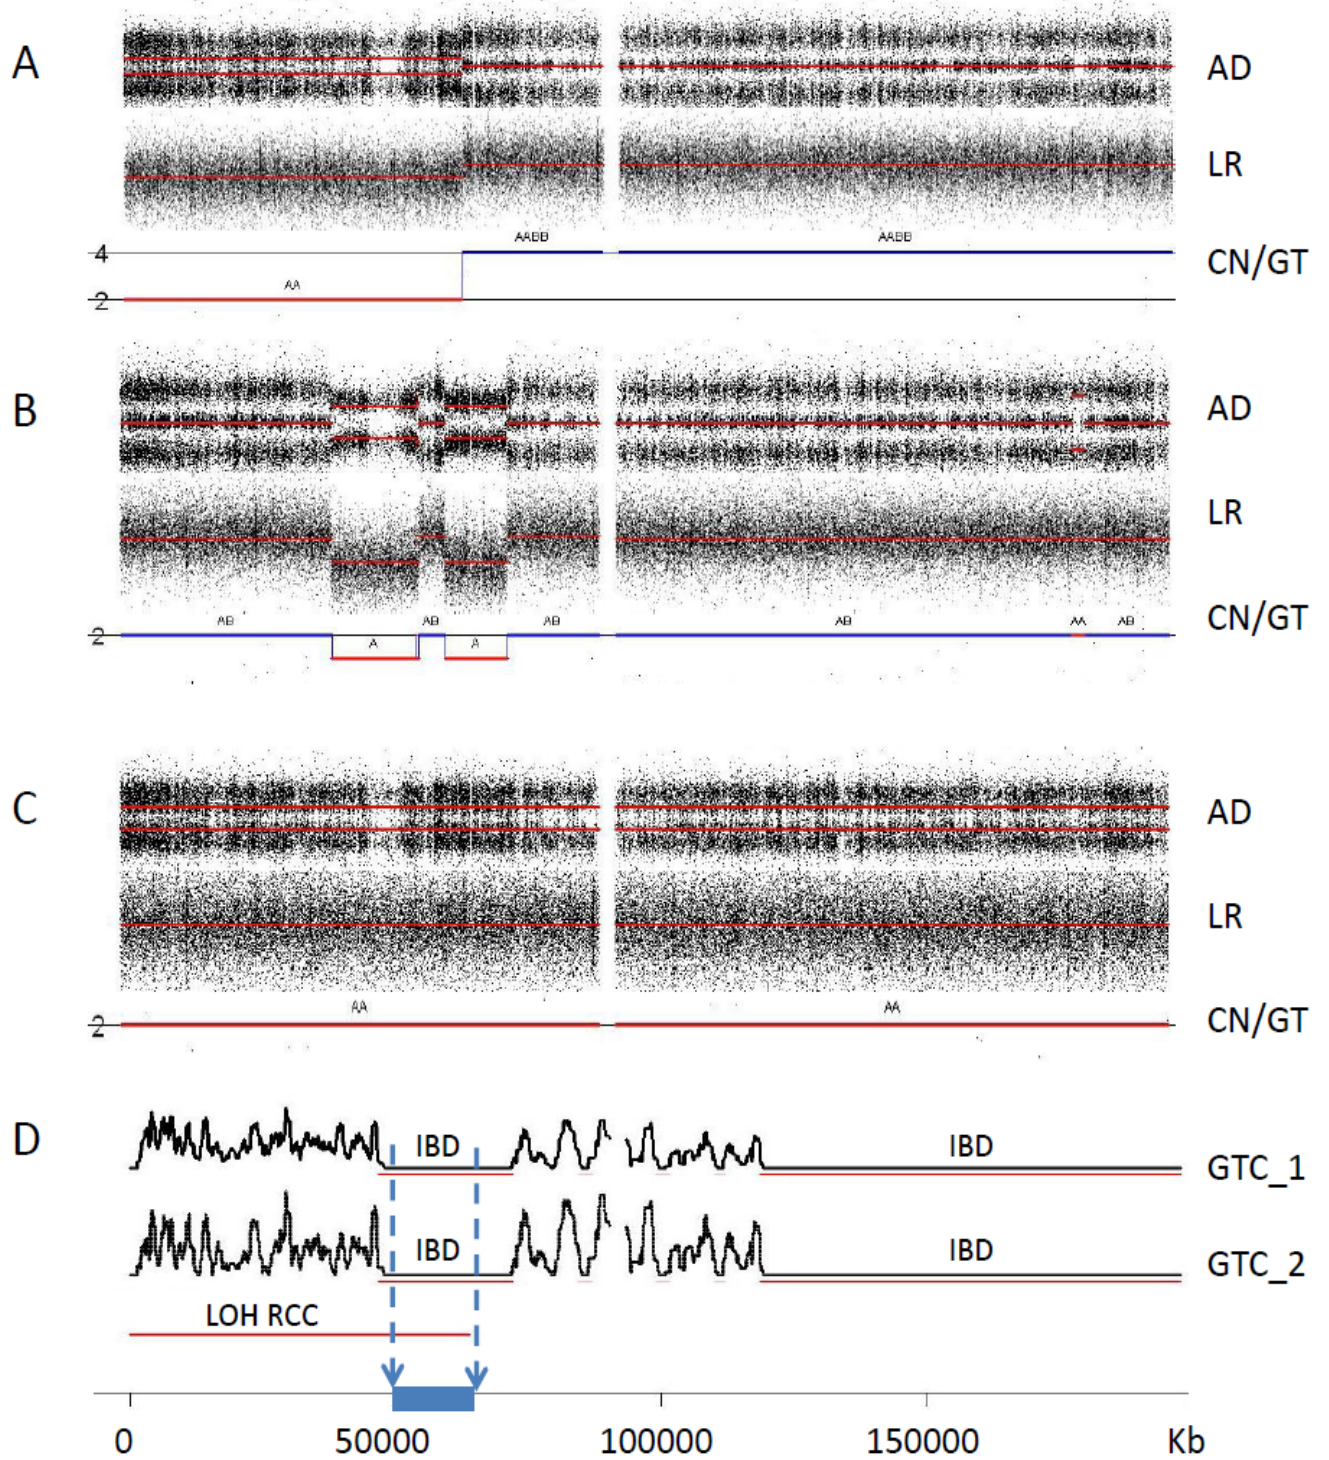

**Figure S1. Delimitation of candidate predisposition gene region by tumor genome profiling and detection of Identical By Descent (IBD) regions in family A.**

A-C. Genomic profiles of RCC from III-1 (A), breast tumors from III-1 (B) and III-3 (C). SNP arrays were normalized and genotyped with Genotyping Console (v.3). Tumor samples were processed by the GAP method (Popova T, 2009) in order to obtain absolute allele specific copy numbers. Loss of Heterozygosity (LOH) status was called for the segments with identical copy number and major allele counts.

D. Genotype inconsistency plots calculated for genotype profiles of renal cell carcinoma (RCC) versus III-5 (GTC\_1) and III-1 versus III-5 (GTC\_2). SNP genotype calls for tumor samples were estimated from Allelic Difference profiles based on the thresholds adjusted by the actual segmental copy number and allelic content. Genotype calls from the LOH region were used to confirm persistence of shared allele in tumor.

AD, LR, CN/GT stand for allelic difference, copy number variation and detected Copy Number and Genotype profiles; LOH is designated on CN/GT profiles by the red color; blue arrows indicate intersection between Identical by descent (IBD) and LOH.

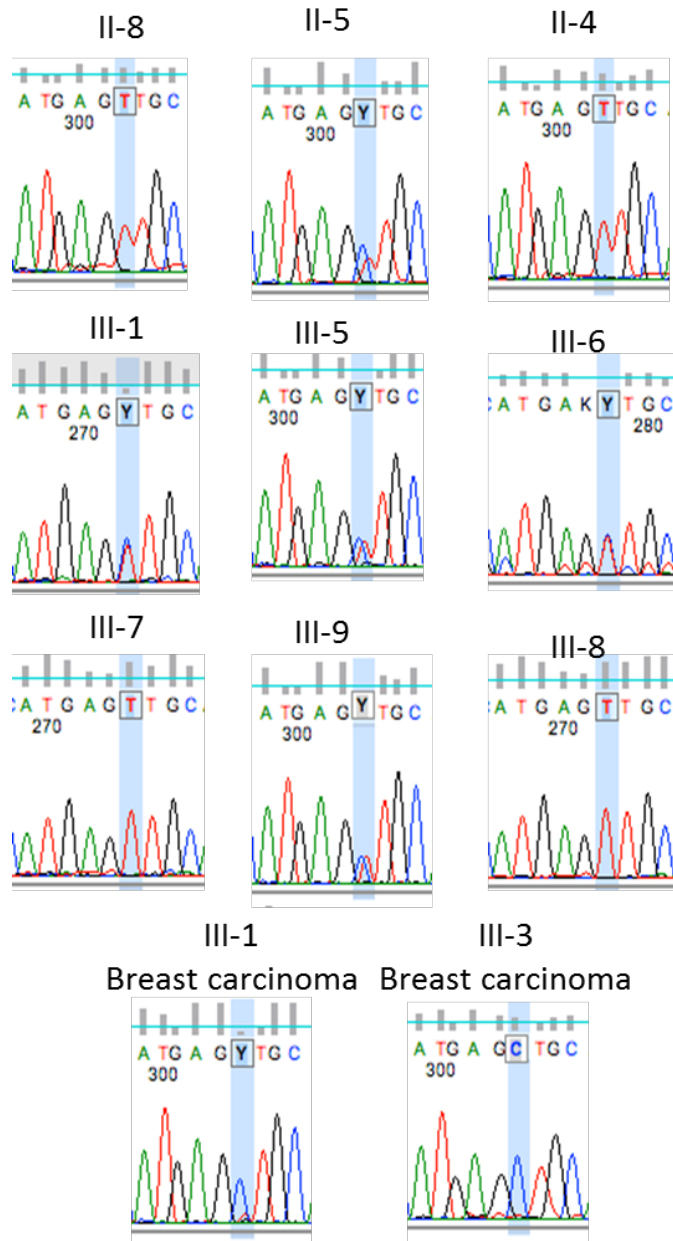

**Figure S2. *BAP1* mutation analysis in family A**

Sanger sequencing electropherograms showing the segregation of the *BAP1* mutation in family A c.277A>G (reverse sequences) and the loss of the wild type allele in 2 breast tumors arisen in this family.

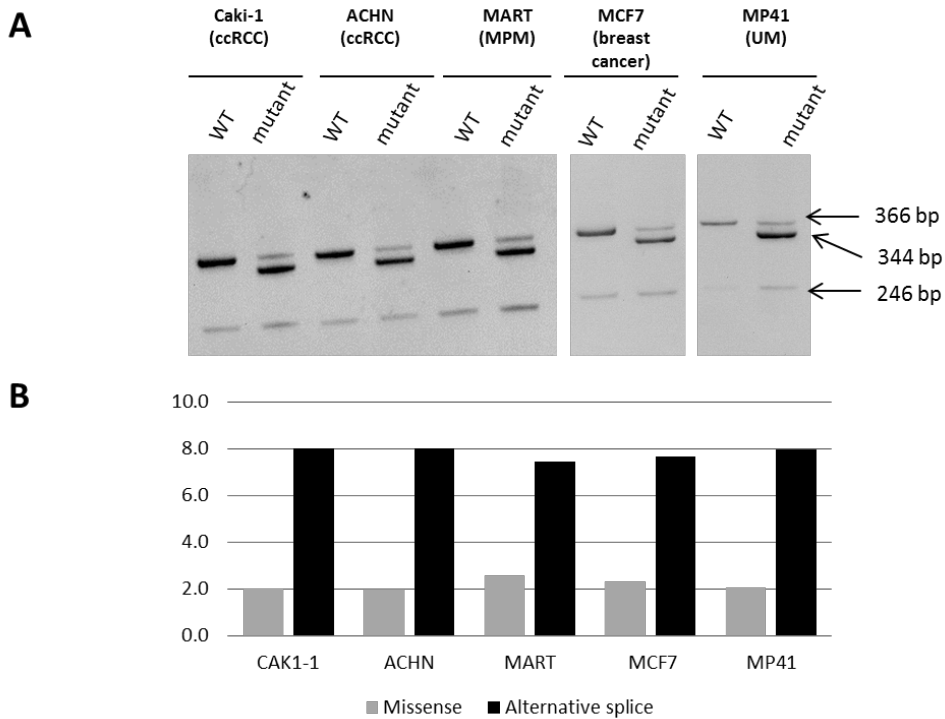

**Figure S3. Splicing effect of *BAP1* mutation by minigene transcript analysis**

The ExonTrap pET01 plasmid (Mo Bi Tec GmbH, Gottingen, Germany) containing *BAP1* exon 5 with or without the family A c.277A>G mutation was constructed. The plasmids were transfected in CAKi-1 and ACHN clear-cell renal cell carcinoma (ccRCC; ATCC HTB-46 and CRL-1611), MART malignant pleural mesothelioma (MPM), MCF7 luminal breast cancer (ATCC HTB-22) and MP41 uveal melanoma (UM) (Némati F, 2010); cell lines and RNA was extracted 48 hours after transfection.

A. Transcript analysis was done after reverse transcription, amplification, and migration on 8% acrylamide gel. Four transcripts are visible: the wild type and the c.277A>G mutation transcripts corresponding to the 366bp bands, the alternatively spliced, and pET01 basal splicing corresponding to 344 and 246bp bands, respectively.

B. Proportion of transcripts with the missense mutation versus proportion of transcripts with alternative splicing after quantification by ImageJ.

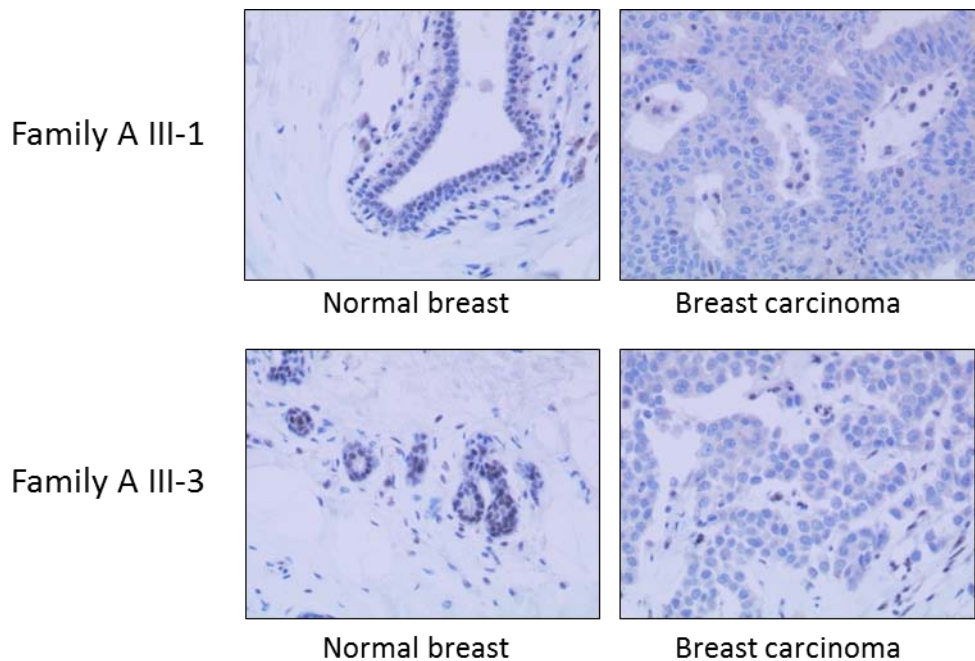

**Figure S4. Immunohistochemistry for BAP1 expression in breast tumors from family A**

The left panel shows adjacent normal breast tissues, right panel the tumor tissues. The purple staining illustrates a nuclear immune-labeling of BAP1 protein. The right panel shows tumor cells with a blue counter-staining indicating a lack of BAP1 expression in these tumors.

**Table S1. Summary of whole exome sequencing in family A**

|                      | III-1     | III-5     | Unknown SNVs* (dbSNP137) |       |                   |
|----------------------|-----------|-----------|--------------------------|-------|-------------------|
|                      |           |           | III-1                    | III-5 | Common/<br>Shared |
| Tags                 | 178556178 | 174674938 |                          |       |                   |
| Mapped               | 123551476 | 141039044 |                          |       |                   |
| Unique               | 105445816 | 120675946 |                          |       |                   |
| SNVs                 | 78490     | 81228     |                          |       |                   |
| Not in self-homology |           |           | 10712                    | 12113 | <b>83</b>         |
| Intergenic           |           |           | 2300                     | 2680  | <b>7</b>          |
| Intronic             |           |           | 7652                     | 8601  | <b>63</b>         |
| Exonic               |           |           | 748                      | 822   | <b>9</b>          |
| Non-synonymous       |           |           | 497                      | 546   | <b>7</b>          |
| In IBD regions       |           |           | 106                      | 117   | <b>4</b>          |
| Probably damaging    |           |           | 97                       | 98    | <b>5</b>          |

\*The resulting list of unknown SNVs was obtained after filtering by (i) minimal coverage for each of the two exomic sequencing runs (>4 reads/run); (ii) frequency of altered allele (<90%, e.g. heterozygous status of the SNV); (iii) absence of self-homology of the locus in the genome (self-homologous regions were obtained from UCSC table browser by extracting “self-chain” feature for the human genome); (iv) not present in dbSNP137 database.

SNV: single nucleotide variant; IBD: identical by descent.

**Table S2. Unknown non-synonymous single nucleotide variants (SNVs) common for family A III-1 and III-5 relatives**

| N | Chromosome | Position  | Ref/Alt | Gene                                             | Accession NCBI                | Variant RNA          | Variant protein             | Prediction* | IBD III-1 / III-5 | IBD RCC III-1 / III-5 | Coverage Ref | Coverage Alt | Alt/Coverage |
|---|------------|-----------|---------|--------------------------------------------------|-------------------------------|----------------------|-----------------------------|-------------|-------------------|-----------------------|--------------|--------------|--------------|
| 1 | 3          | 52442072  | A/G     | <i>BAP1</i> <sup>a</sup>                         | NM_004656.2                   | c.A277G              | p.Thr93Ala                  | h           | 1                 | 1                     | 22           | 8            | 0.27         |
| 2 | 3          | 124397063 | G/A     | <i>KALRN</i> <sup>a</sup>                        | NM_001024660.3<br>NM_007064.3 | c.G7220A<br>c.G2129A | p.Arg2407His<br>p.Arg710His | h           | 1                 | 1                     | 21           | 14           | 0.4          |
| 3 | 7          | 43484869  | G/T     | <i>HECW1</i> <sup>c</sup>                        | NM_015052.3                   | c.G2098T             | p.Arg700S                   | m           | 0                 | 0                     | 38           | 8            | 0.21         |
| 4 | 8          | 145668066 | T/C     | <i>TONSL</i> <sup>b</sup>                        | NM_013432.4                   | c.T572C              | p.Leu191Pro                 | h           | 0                 | 0                     | 7            | 6            | 0.53         |
| 5 | 13         | 103519045 | G/A     | <i>ERCC5</i> <sup>a</sup> ;<br><i>BIVM-ERCC5</i> | NM_000123.3<br>NM_001204425.1 | c.G2383A<br>c.G3745A | p.Arg795Thr<br>p.Arg1249Thr | h           | 1                 | 1                     | 25           | 21           | 0.48         |
| 6 | 13         | 107187273 | G/A     | <i>EFNB2</i> <sup>c</sup>                        | NM_004093.3                   | c.G40A               | p.Glu14Ser                  | m           | 1                 | 1                     | 26           | 17           | 0.4          |
| 7 | 14         | 39647068  | T/A     | <i>PNN</i> <sup>b</sup>                          | NM_002687.3                   | c.T446A              | p.Leu149X                   | h           | 0                 | 0                     | 18           | 7            | 0.44         |

\*m – medium and h – high predicted effect on the protein function by PolyPhen.

Ref/Alt: reference allele/alternative allele; IBD: identical by descent; IBD RCC: allelic variant in IBD region retained in the RCC from III-1.

a, b and c: validated, not validated and not tested by Sanger sequencing, respectively.



**Table S3. Unknown indel leading to frameshift in coding regions in family A**

| N | Chromosome | Position | InDel* | Gene         | Accession<br>NCBI          | Variant RNA             | IBD III-1/III-5 | Coverage Ref | Coverage Alt | Alt/Coverage |
|---|------------|----------|--------|--------------|----------------------------|-------------------------|-----------------|--------------|--------------|--------------|
| 1 | 20         | 58587784 | 11     | <i>CDH26</i> | NM_021810.4<br>NM_177980.2 | c.497delA<br>c.2498delA | 0               | 39           | 5            | 0.13         |

\*Short insertions and deletions (InDel) were searched by two different approaches: (i) using Bioscope pipeline (Applied Biosystems) for InDels detection; and (ii) aligning non mapped reads with BWA aligner (with 10 mismatches, 2 gap openings and maximal gap extension of 10 bp) and calling InDels by the SAMtools pileup (Li H, 2009). Short insertions and deletions annotated with SeattleSeq Annotation tool (<http://snp.gs.washington.edu/SeattleSeqAnnotation137>).

Ref/Alt: reference allele/alternative allele; IBD: identical by descent

**Table S4. Identical by descent (IBD) regions and cancers in family A**

| chr | position    | size | Nb SNPs | III-1 kidney breast <sup>a</sup> | III-3 breast | III-5 kidney | III-6 healthy | III-7 lung | III-8 breast | III-9 ACUP | II-8 healthy |
|-----|-------------|------|---------|----------------------------------|--------------|--------------|---------------|------------|--------------|------------|--------------|
| 3p  | 47.4-71.7   | 20.1 | 8072    | 1 <sup>b</sup>                   | 1            | 1            | 1             | 0          | 0            | 1          | 0            |
| 3q  | 162.9-197.9 | 7.1  | 1870    | 1                                | 1            | 1            | 1             | 1          | 0            | 1          | 1            |
| 4p  | 9.9-28.3    | 17.5 | 6713    | 1                                | 1            | 1            | 1             | 0          | 0            | 1          | 0            |
| 4q  | 139.4-146.2 | 6.7  | 1809    | 1                                | 1            | 1            | 0             | 1          | 0            | 0          | 1            |
| 7p  | 0.1-13.9    | 6.2  | 2790    | 1                                | 1            | 1            | 0             | 1          | 0            | 1          | 0            |
| 7q  | 61.1-71.9   | 5.2  | 1689    | 1                                | 1            | 1            | 0             | 1          | 1            | 1          | 0            |
| 7q  | 155.5-159.0 | 3.5  | 980     | 1                                | 1            | 1            | 0             | 1          | 0            | 0          | 1            |
| 13q | 99.5-112.0  | 3.1  | 1659    | 1                                | 1            | 1            | 1             | 0          | 0            | 1          | 0            |
| 18p | 1.6-8.5     | 6.9  | 2900    | 1                                | 1            | 1            | 1             | 1          | 1            | 1          | 0            |
| 19p | 6.9-24.5    | 11.1 | 2126    | 1                                | 1            | 1            | 1             | 1          | 1            | 1          | 0            |
| 20p | 13.8-26.3   | 12.5 | 5133    | 1                                | 1            | 1            | 0             | 1          | 1            | 1          | 0            |

<sup>a</sup> : Segregation analysis was performed based on identical by descent (IBD) regions inferred from the SNP-array genotyping of constitutional DNA (available for 10 individuals). IBD segments for any two individuals were inferred by calculating number of contradictory calls (AA/BB and BB/AA pairs) in a 400 SNPs sliding window; less than 5 contradictory SNP calls per sliding window were taken as compatible with allele sharing; 40 SNPs window was used to narrow down the IBD boundary; minimal region of IBD was set at 3Mb. Segments with haplotype shared between III-1, III-3 and III-5 individuals were compared to other genotyped individuals from the generation III and individual II-8. <sup>b</sup> : “1” indicated IBD and “0”, the absence of IBD in this given region. Chr: chromosome; position is given in megabases; size: size of the IBD segment in megabases; Nb SNPs: number of contiguous SNPs in Affymetrix SNP6.0 included in the IBD segment. ACUP: adenocarcinoma of unknown primary origin. Heathy: no reported malignancy.

**Table S5. Rare non-synonymous single nucleotide polymorphisms (SNPs) common for family A III-1 and III-5 relatives**

| N | Chromosome | Position  | Ref/Alt | Gene          | rsID        | MAF   | Prediction* | IBD III-1 / III-5 | LOH RCC III-1 | Coverage Ref | Coverage Alt | Alt/Coverage |
|---|------------|-----------|---------|---------------|-------------|-------|-------------|-------------------|---------------|--------------|--------------|--------------|
| 1 | 3          | 121388135 | C/T     | <i>GOLGB1</i> | rs114155768 | 0.165 | h           | 1                 | 0             | 36           | 13           | 0.27         |
| 2 | 11         | 47647238  | A/G     | <i>MTCH2</i>  | rs78071782  | NA    | h           | 1                 | 0             | 49           | 29           | 0.37         |
| 3 | 11         | 47647265  | A/G     | <i>MTCH2</i>  | rs76666113  | 0.044 | h           | 1                 | 0             | 49           | 25           | 0.34         |
| 4 | 19         | 10334725  | A/G     | <i>S1PR2</i>  | rs117064827 | 0.815 | h           | 1                 | 0             | 7            | 7            | 0.50         |
| 5 | 20         | 13846148  | C/T     | <i>SEL1L2</i> | rs146654307 | 0.151 | h           | 1                 | 0             | 20           | 21           | 0.51         |
| 6 | 20         | 42341646  | G/A     | <i>MYBL2</i>  | rs138907287 | 0.055 | h           | 1                 | 0             | 20           | 7            | 0.26         |

\* h – high predicted effect on the protein function by PolyPhen.

Ref/Alt: reference allele/alternative allele; rsID: nomenclature of the single nucleotide polymorphism in dbSNPv137; MAF: minor allele frequency in dbSNPv137; NA: non available; IBD: identical by descent; LOH RCC: loss of heterozygosity of the SNP locus in the RCC from III-1. The gray column points out the absence of LOH in family A RCC for all loci, excluding them as gene candidates.

**Table S6. Clinical characteristics of the familial renal cell carcinoma (RCC) cohort**

| ID    | Index Case                             |              | RCC in the family |               |              | Other cancers in the family                   |
|-------|----------------------------------------|--------------|-------------------|---------------|--------------|-----------------------------------------------|
|       | RCC                                    | Age at onset | Relatives         | Cancer        | Age at onset |                                               |
| c2_01 | ccRCC                                  | 39           | sister            | ccRCC         | 43           | prostate                                      |
|       |                                        |              | father            | renal cyst    | NA           |                                               |
| c2_02 | ccRCC                                  | 66           | brother           | RCC           | 34           |                                               |
| c2_03 | ccRCC                                  | 43           | aunt              | RCC           | 70           | pancreas, breast                              |
|       |                                        |              | cousin            | RCC           | 50           |                                               |
| c2_04 | atypical papillary RCC                 | 65           | father            | RCC           | NA           | prostate                                      |
|       |                                        |              | grandfather       | RCC           | NA           |                                               |
| c2_05 | bilateral ccRCC<br>polycystic syndrome | 33<br>NA     |                   |               |              |                                               |
| c2_06 | ccRCC                                  | 30           | father            | ccRCC         | 42           |                                               |
| c2_07 | ccRCC                                  | 53           | twin brother      | ccRCC         | 53           |                                               |
|       |                                        |              | mother            | RCC           | 58           |                                               |
| c2_08 | VHL-like*                              |              |                   |               |              |                                               |
| c2_09 | ccRCC<br>renal cysts                   | 43<br>NA     | father            | RCC           | 73           |                                               |
| c2_10 | ccRCC<br>renal cysts                   | 44<br>NA     | father            | ccRCC         | 44           |                                               |
|       |                                        |              | uncle             | ccRCC         | 62           |                                               |
| c2_11 | ccRCC<br>renal cysts                   | 42<br>NA     | mother            | RCC           | 54           |                                               |
|       |                                        |              | aunt              | RCC           | NA           |                                               |
| c2_12 | ccRCC                                  | 40           | mother            | ccRCC         | 69           | breast                                        |
| c2_13 | RCC                                    | 45           | brother           | RCC           | 34           | naevi, pancreas,<br>breast, lung,<br>prostate |
| c2_14 | bilateral papillary<br>RCC             | 53           | grandfather       | bilateral RCC | 66           | naevi                                         |
| c2_15 | ccRCC                                  | 33           | mother            | RCC           | 56           |                                               |
| c2_16 | ccRCC                                  | 62           | father            | RCC           | 53           | testis                                        |
| c2_17 | ccRCC                                  | 58           | father            | RCC           | 68           |                                               |
| c2_18 | ccRCC                                  | 70           | son               | ccRCC         | 41           | naevi                                         |
|       |                                        |              | daughter          | ccRCC         | 40           |                                               |
| c2_19 | ccRCC                                  | 38           | father            | RCC           | 68           |                                               |
| c2_20 | ccRCC                                  | 31           | father            | ccRCC         | 52           |                                               |
| c2_21 | ccRCC                                  | 34           | brother           | ccRCC         | 54           | lung, B-cell<br>lymphoma                      |
| c2_22 | ccRCC                                  | 62           | father            | RCC           | 84           |                                               |
| c2_23 | angiomyolipoma                         | 45           | mother            | ccRCC         | 60           |                                               |
|       |                                        |              | brother           | RCC           | 57           |                                               |

|       |                 |         |         |                 |         |  |
|-------|-----------------|---------|---------|-----------------|---------|--|
| c2_24 | ccRCC           | 48      | father  | RCC             | 74      |  |
| c2_25 | ccRCC           | 63      | brother | bilateral ccRCC | 57      |  |
|       |                 |         | cousin  | RCC             | 60      |  |
| c2_26 | ccRCC           | 45      | mother  | RCC             | NA      |  |
| c2_27 | bilateral ccRCC | 54 & 58 | mother  | bilateral ccRCC | 81 & 84 |  |
| c2_28 | ccRCC           | 49      | brother | RCC             | 73      |  |
| c2_29 | ccRCC           | 46      | cousin  | RCC             | NA      |  |
| c2_30 | ccRCC           | 38      | cousin  | RCC             | 55      |  |
| c2_31 | ccRCC           | 53      | brother | RCC             | 52      |  |
| c2_32 | ccRCC           | 48      | father  | RCC             | 46      |  |
| c2_33 | ccRCC           | 54      | mother  | RCC             | 77      |  |

RCC: renal cell carcinoma, ccRCC clear-cell RCC, NA: non available;

VHL-like\*: family with typical Von Hippel Lindau (VHL) syndrome without VHL gene mutation identified. This family was therefore discarded from the study. Age of onset is given in years. This series of individuals was provided by the Centre Expert National Cancers Rares PREDIR, Le Kremlin-Bicêtre, France.

**Table S7. Primers used for *BAP1* screening and sequencing**

| Primer Sequence        | Forward (F) or Reverse (R ) | Exons covered | Multiplex PCR for EMMA screen <sup>a</sup> |
|------------------------|-----------------------------|---------------|--------------------------------------------|
| TTGTCTGTGTGTGGGACTGA   | F                           | 1 - 2         | Mix 1                                      |
| CTGCGATGAGGAAAGGAAAG   | R                           | 1 - 2         | Mix 1                                      |
| TCGGTAAGAGCCTTTTCTCC   | F                           | 3             | Mix 4                                      |
| GGCTGCTACAAAAGGGAAG    | R                           | 3             | Mix 4                                      |
| ATCACAGCAAGGACACCTGA   | F                           | 4             | Mix 3                                      |
| CCCTTCTCAGCTCCTTTCAT   | R                           | 4             | Mix 3                                      |
| GCAAAGATGAAAGGAGCTGA   | F                           | 5             | Mix 4                                      |
| CCGCAACTGCATCTAAAAAC   | R                           | 5             | Mix 4                                      |
| CCCACCAGCCTTTTAAGAAA   | F                           | 6 -7          | Mix 1                                      |
| GGCAATATGGTGTAGGGTGA   | R                           | 6 -7          | Mix 1                                      |
| GGGTTTCACCCTACACCATATT | F                           | 8             | Mix 2                                      |
| TGGTACCTTCCAACAAGCTG   | R                           | 8             | Mix 2                                      |
| TTCCAGATAGGCCCTCATA    | F                           | 9             | Mix 3                                      |
| GGGCAAAGAAAAGATGTGGT   | R                           | 9             | Mix 3                                      |
| TCCCTGTGAGTGAATGGGTA   | F                           | 10            | Mix 1                                      |
| ACAGGTGCCTTTCTTTAGGG   | R                           | 10            | Mix 1                                      |
| AGAGCTTGCTGACTCCCATT   | F                           | 11            | Mix 3                                      |
| AGGATGAACACCAAGGAACC   | R                           | 11            | Mix 3                                      |
| CCATGTTGGCTTTCTCTCTGG  | F                           | 12            | Mix 2                                      |
| TCAACATTATCTGCTGCAGGG  | R                           | 12            | Mix 2                                      |
| GGCTTAGCATGGCTAGTTCA   | F                           | 13A           | Mix 4                                      |
| TCCTCTCCAAAAGCACCTT    | R                           | 13A           | Mix 4                                      |
| TCCCAGAAGGACCTCTCAAT   | F                           | 13B           | Mix 1                                      |
| TGGGAAGAGAGGTCACAAGA   | R                           | 13B           | Mix 1                                      |
| AAGGTGCTTTTTGGAGAGGA   | F                           | 14            | Mix 2                                      |
| GAAAGTCTTCTGGCACATGG   | R                           | 14            | Mix 2                                      |
| AAGAGGTAGAGACCCTTGAGCA | F                           | 15 -16        | Mix 4                                      |
| CTGAGCCAGCATGGAGATAA   | R                           | 15 -16        | Mix 4                                      |
| CGCTGCTGTCTTAACTGGAA   | F                           | 17            | Mix 2                                      |
| TCTCCAGCTGGGACTATTCA   | R                           | 17            | Mix 2                                      |

<sup>a</sup>Screening for *BAP1* mutations was performed using Enhanced Mismatch Mutation Analysis (EMMA, Fluigent (Houdayer C, 2010)). 4 multiplex PCR were used to screen *BAP1* exons. *BAP1* coding regions were divided into amplicons of 450 bp or less. Raw data were analyzed using the dedicated Emmalys software (Fluigent, P/N: 5331254102). Heteroduplexes were detected by PCR fragments migration on ABI PRISM<sup>®</sup> 3100 Genetic Analyser (Applied Biosystems). For abnormal EMMA profiles, *BAP1* exons were amplified with the same set of primers and sequenced with BigDye Terminator V1.1, and analyzed using Seqscape V2.5 software (Applied Biosystems) according to the standard protocols.

**Table S8. Clinical characteristics of familial cases with UM, MPM or CM**

| ID    | Center for diagnosis | Index Case |          |              | BAP1 associated cancers in relatives |     |        |              | Other cancers in the family                       | BAP1 status |
|-------|----------------------|------------|----------|--------------|--------------------------------------|-----|--------|--------------|---------------------------------------------------|-------------|
|       |                      | sex        | Cancer   | Age at onset | Relative                             | sex | Cancer | Age at onset |                                                   |             |
| c1_01 | IC                   | F          | UM       | 69           | cousin                               | M   | UM     | 58           | lung, pancreas, breast                            | wt          |
| c1_02 | IC                   | M          | UM       | 33           | cousin                               | M   | UM     | 55           |                                                   | wt          |
| c1_03 | IC                   | M          | UM       | 55           | father                               | M   | UM     | 77           | prostate, breast                                  | wt          |
| c1_04 | IC                   | M          | UM       | 70           | sister                               | F   | UM     | 70           |                                                   | wt          |
| c1_05 | IC                   | M          | UM       | 73           | niece                                | F   | UM     | 55           | esophagus                                         | wt          |
|       |                      |            |          |              | sister                               | F   | CM     | NA           |                                                   |             |
| c1_06 | IC                   | M          | UM       | 68           | sister                               | F   | UM     | NA           | histiocytoma, ovary, blood, prostate, lung, colon | wt          |
| c1_07 | IC                   | F          | UM       | 70           | sister                               | F   | UM     | 43           | myeloma, pituitary, brain                         | wt          |
|       |                      |            |          |              | sister                               | F   | CM     | 62           |                                                   |             |
| c1_08 | IC                   | F          | UM       | 47           | aunt                                 | F   | UM     | 49           |                                                   | wt          |
| c1_09 | IC                   | F          | UM       | 69           | cousin                               | M   | UM     | 67           | lung                                              | wt          |
| c1_10 | IC                   | F          | UM       | 47           | mother                               | F   | CM     | 64           | colon                                             | wt          |
| c1_11 | IC                   | F          | UM       | 53           | brother                              | M   | 2XCM   | 63           | breast                                            | wt          |
| c1_12 | IC                   | F          | UM       | 30           | uncle                                | M   | CM     | 34           | lung                                              | wt          |
|       |                      |            |          |              | aunt                                 | F   | CM     | NA           |                                                   |             |
| c1_13 | IC                   | M          | UM       | 68           | daughter                             | F   | CM     | 51           | lymphoma, breast, prostate                        | wt          |
| c1_14 | IC                   | F          | UM       | 63           | niece                                | F   | CM     | 43           | breast, colon                                     | wt          |
|       |                      |            |          |              | niece                                | F   | RCC    | 43           |                                                   |             |
| c1_15 | IC                   | F          | UM       | 60           | sister                               | F   | CM     | NA           | colon, stomach                                    | wt          |
|       |                      |            |          |              | niece                                | F   | CM     | NA           |                                                   |             |
| c1_16 | IC                   | M          | UM       | 38           | mother                               | F   | CM     | 27           | prostate                                          | wt          |
| c1_17 | IC                   | M          | UM       | 66           | brother                              | M   | CM     | 39           | breast, colon                                     | wt          |
| c1_18 | IC                   | F          | UM       | 43           | father                               | M   | CM     | 54           | stomach, uterus, liver, bladder                   | wt          |
| c1_19 | IC                   | M          | UM       | 24           | uncle                                | M   | CM     | 50           | head-and-neck                                     | wt          |
| c1_20 | IC                   | F          | UM       | 22           | grandmother                          | F   | CM     | 65           | breast                                            | wt          |
| c1_21 | IC                   | F          | UM       | 65           | mother                               | F   | CM     | 74           | colon, liver                                      | wt          |
| c1_22 | IC                   | M          | UM<br>CM | 37<br>38     | grandfather                          | M   | CM     | 69           |                                                   | wt          |
| c1_23 | IC                   | F          | UM       | 65           | father                               | M   | CM     | 85           | pancreas, colon, breast                           | wt          |
| c1_24 | IC                   | M          | UM       | 71           | mother                               | F   | CM     | 90           | stomach, pancreas                                 | wt          |
|       |                      |            |          |              | grandfather                          | M   | CM     | 75           |                                                   |             |

|       |        |   |           |              |                    |   |     |    |                                             |    |
|-------|--------|---|-----------|--------------|--------------------|---|-----|----|---------------------------------------------|----|
| c1_25 | IC     | M | UM<br>RCC | 55, 58<br>56 | aunt               | F | CM  | NA | cervix                                      | wt |
|       |        |   |           |              | aunt               | F | RCC | NA |                                             |    |
| c1_26 | IC     | F | UM        | 12           | grandaunt          | F | CM  | 50 | testis                                      | wt |
| c1_27 | IC     | F | UM        | 36           | uncle              | M | CM  | 55 | breast                                      | wt |
|       |        |   |           |              | uncle              | M | RCC | 39 |                                             |    |
|       |        |   |           |              | grandfather        | M | RCC | NA |                                             |    |
| c1_28 | IC     | F | MPM       | 60           | father             | M | MPM | 60 | leukemia                                    | wt |
|       |        |   |           |              | uncle_1            | M | MPM | 60 |                                             |    |
|       |        |   |           |              | uncle_2            | M | MPM | 48 |                                             |    |
| c1_29 | IC     | F | MPM       | 49           | cousin             | M | MPM | 49 | prostate, lung                              | wt |
| c1_30 | IC     | F | UM        | 65           | sister             | F | CM  | 71 | breast, lung,<br>colon, prostate,<br>uterus | wt |
| c1_31 | IGR    | F | UM        | 43           | father             | M | CM  | 70 |                                             | wt |
|       |        |   |           |              | cousin             | M | CM  | 44 |                                             |    |
| c1_32 | IGR    | M | CM        | 58           | sister             | F | UM  | 48 | NA                                          | wt |
| c1_33 | IC/IGR | F | MPM       | 62           | brother            | M | MPM | 50 | liver, thyroid                              | wt |
|       |        |   |           |              | brother            | M | RCC | 50 |                                             |    |
| c1_34 | IGR    | M | CM        | 62           | father             | M | UM  | 50 | NA                                          | wt |
| c1_35 | HB     | F | CM        | 90           | son                | M | UM  | NA | endometrium                                 | wt |
| c1_36 | HB     | M | UM        | 24           | father             | M | CM  | 60 | pancreas                                    | wt |
| c1_37 | HB     | F | CM        | 40           | uncle              | M | UM  | NA | CNS                                         | wt |
|       |        |   |           |              | grandfather        | M | UM  | NA |                                             |    |
|       |        |   |           |              | granduncle         | M | UM  | NA |                                             |    |
| c1_38 | HB     | F | CM        | NA           | brother            | M | CM  | NA | prostate                                    | wt |
|       |        |   |           |              | father             | M | UM  | NA |                                             |    |
| c1_39 | HB     | M | CM        | 76           | brother            | M | UM  | NA | prostate                                    | wt |
| c1_40 | HB     | M | CM        | 49           | mother             | F | UM  | NA | NA                                          | wt |
| c1_41 | HB     | F | CM        | 58           | cousin             | M | UM  | NA | breast                                      | wt |
| c1_42 | HB     | M | CM        | 60           | mother             | F | UM  | NA | NA                                          | wt |
| c1_43 | HB     | F | UM        | 51           | nephew_1           | M | CM  | NA | NA                                          | wt |
|       |        |   |           |              | nephew_2           | M | CM  | NA |                                             |    |
| c1_44 | HB     | F | CM        | 44           | mother             | F | UM  | NA | NA                                          | wt |
| c1_45 | HB     | F | CM        | 49           | mother             | F | UM  | NA |                                             | wt |
| c1_46 | HB     | M | CM        | 63           | maternal<br>cousin | F | UM  | NA | breast                                      | wt |
|       |        |   |           |              | uncle              | M | CM  | NA |                                             |    |
| c1_47 | HB     | F | CM        | 49           | brother            | M | UM  | NA | basal cell<br>carcinoma,<br>breast, colon   | wt |
|       |        |   |           |              | cousin             | M | CM  | NA |                                             |    |
| c1_48 | HB     | M | UM<br>CM  | 40<br>40     |                    |   |     |    |                                             | wt |
| c1_49 | HB     | F | UM<br>CM  | 43<br>43     |                    |   |     |    | NA                                          | wt |



|                   |      |   |           |                |              |   |     |    |                  |     |
|-------------------|------|---|-----------|----------------|--------------|---|-----|----|------------------|-----|
| c1_50<br>family B | NHCS | M | UM<br>RCC | 35<br>36       | brother      | M | UM  | 49 |                  | mut |
|                   |      |   |           |                | uncle        | M | UM  | NA |                  |     |
|                   |      |   |           |                | sister       | F | RCC | 54 |                  |     |
|                   |      |   |           |                | mother       | F | RCC | 57 |                  |     |
| c1_51<br>family C | IC   | M | UM<br>MPM | 52<br>59       | twin brother | M | UM  | 53 | bladder, colon   | mut |
|                   |      |   |           |                | twin brother | M | MPM | 59 |                  |     |
|                   |      |   |           |                | cousin       | F | MPM | 41 |                  |     |
|                   |      |   |           |                | aunt         | F | RCC | 50 |                  |     |
| c1_52<br>family E | IC   | F | UM        | 44             | father       | M | MPM |    | thyroid, bladder | mut |
|                   |      |   |           |                | grandfather  | M | MPM |    |                  |     |
| c1_53<br>family F | CHHG | M | MPM       | 41             | father       | M | MPM | 64 |                  | mut |
| c1_54<br>family G | HC   | F | CM<br>RCC | 29,31,34<br>NA | father       | M | MPM | 59 |                  | mut |
|                   |      |   |           |                | brother      | M | CM  | 49 |                  |     |
|                   |      |   |           |                | sister       | F | UM  | 57 |                  |     |
| c1_55<br>family I | IJG  | F | UM        | 44             | father       | M | CM  | 66 |                  | mut |
| c1_56<br>family J | HB   | F | UM        | 53             | brother_1    | M | MPM | 51 | uterus, lung     | mut |
|                   |      |   |           |                | brother_2    | M | CM  | 45 |                  |     |
|                   |      |   |           |                | brother_2    | M | RCC | 53 |                  |     |
|                   |      |   |           |                | sister       | F | RCC | 33 |                  |     |
|                   |      |   |           |                | nephew       | M | UM  | 18 |                  |     |
| c1_57<br>family K | HB   | F | CM        | 47, 52         | mother       | F | CM  | 58 | breast, lung     | mut |
|                   |      |   |           |                | brother_1    | M | CM  | 55 |                  |     |
|                   |      |   |           |                | brother_2    | M | MPM | 38 |                  |     |
|                   |      |   |           |                | brother_3    | M | RCC | 34 |                  |     |
|                   |      |   |           |                | sister       | F | UM  | 42 |                  |     |
| c1_58<br>family D | IC   | M | UM<br>CM  | 48<br>34       | mother       | F | UM  | 70 | breast, lung     | mut |
|                   |      |   |           |                | grandfather  | M | RCC | 55 |                  |     |
| c1_59<br>Family H | HC   | M | MPM       | 62             | brother      | M | MPM | 59 | breast           | mut |
| c1_60<br>family L | HB   | M | CM        | 47             | mother       | F | UM  | 71 | colon, prostate  | mut |

UM, uveal melanoma; CM, cutaneous melanoma; RCC, renal cell carcinoma; MPM, malignant pleural mesothelioma; CNS, tumor of the central nervous system; NA, not available. Age of onset is indicated in years. *BAP1* status: *BAP1* gene mutational status of the index case is indicated. mut: deleterious mutation; wt: wild-type. Center of diagnosis: IC: Institut Curie, Paris, France; HC: Hopital Cochin, Paris, France; IGR: Institut Gustave Roussy, Villejuif, France; HB: Hopital Bichat – Claude Bernard, Paris, France; NHCS: Nouvel Hopital Civil de Strasbourg, Strasbourg, France; CHHG: Centre Hospitalier Georges Renon, Niort, France; IJG: Institut Jean Godinot, Reims, France.

**Table S9. Clinical characteristics of families carrying a *BAP1* deleterious mutation**

| Family   | Individual | Cancers                      | Age at onset | BAP1 status | Gender | status   |
|----------|------------|------------------------------|--------------|-------------|--------|----------|
| family B | I-1        | RCC                          | 57           |             | F      | deceased |
|          | I-2        | no                           |              |             | F      | deceased |
|          | I-3        | UM                           | NA           |             | M      | deceased |
|          | II-1       | UM; RCC                      | 49; 36       | mut         | M      | alive    |
|          | II-2       | RCC                          | 54           |             | F      | deceased |
|          | II-3       | UM                           | 35           |             | NA     | alive    |
|          | III-1      | Spinal tumor                 | NA           |             | M      | alive    |
|          | III-2      | no                           |              |             | F      | alive    |
|          | III-3      | no                           |              |             | F      | alive    |
|          | III-4      | no                           |              |             | M      | alive    |
|          | III-5      | no                           |              |             | M      | deceased |
|          | III-6      | no                           |              |             | F      | alive    |
|          | III-7      | no                           |              |             | F      | alive    |
| III-8    | no         |                              |              | F           | alive  |          |
| family C | I-1        | RCC                          | 50           |             | F      | deceased |
|          | I-2        | no                           |              |             | F      | unknown  |
|          | I-3        | Digestive tract cancer       | 45           |             | M      | deceased |
|          | I-4        | MPM                          | 54           |             | M      | deceased |
|          | II-1       | no                           |              |             | F      | alive    |
|          | II-2       | no                           |              |             | M      | alive    |
|          | II-3       | Unknown origin               | NA           | wt          | M      | deceased |
|          | II-4       | MPM                          | 41           | mut         | F      | alive    |
|          | II-5       | MPM; UM                      | 59; 52       | mut         | M      | alive    |
|          | II-6       | UM                           | 54           | mut         | M      | deceased |
| family D | I-1        | RCC                          | 55           |             | M      | deceased |
|          | I-1        | Lung                         | NA           |             | NA     | unknown  |
|          | II-1       | UM                           | 70           |             | F      | deceased |
|          | II-2       | no                           |              |             | M      | deceased |
|          | II-3       | no                           |              |             | F      | alive    |
|          | III-1      | no                           |              |             | M      | alive    |
|          | III-2      | CM; UM; Basal-cell carcinoma | 34; 48; 51   | mut         | M      | alive    |
|          | III-3      | no                           |              |             | M      | alive    |
|          | III-4      | no                           |              |             | M      | alive    |
|          | III-5      | no                           |              |             | F      | alive    |
|          | III-6      | no                           |              |             | M      | alive    |
| III-7    | UM         | 44                           |              | M           | alive  |          |
| family E | I-1        | MPM                          | 60           |             | M      | deceased |
|          | II-1       | MPM; Thyroid; Bladder        | 60; 55; 58   |             | M      | deceased |
|          | III-1      | UM; Thyroid                  | 44; 34       | mut         | F      | deceased |
|          | III-2      | no                           |              |             | F      | alive    |
|          | III-3      | no                           |              |             | M      | deceased |

|          |      |          |        |     |   |          |
|----------|------|----------|--------|-----|---|----------|
| family F | I-1  | MPM      | 64     |     | M | deceased |
|          | II-1 | MPM      | 41     | mut | M | deceased |
|          | II-2 | NA       | NA     |     | M | alive    |
| family G | I-1  | MPM      | 59     |     | M | deceased |
|          | II-1 | CM; Lung | 49; 50 | mut | M | deceased |
|          | II-2 | UM       | 57     | mut | F | alive    |
|          | II-3 | CM; RCC  | 29; 36 | mut | F | alive    |
|          | II-4 | no       |        | wt  | M | alive    |
|          | II-5 | no       |        | wt  | M | alive    |
|          | II-6 | no       |        | wt  | F | alive    |
| family H | I-1  | MPM      | NA     |     | M | deceased |
|          | I-2  | no       |        |     | F | alive    |
|          | I-3  | MPM      | 62     | mut | M | alive    |
|          | II-1 | no       |        |     | F | alive    |
|          | II-2 | no       |        |     | F | alive    |
|          | II-3 | no       |        |     | M | alive    |
|          | II-4 | no       |        |     | F | alive    |
|          | II-5 | no       |        |     | F | alive    |
| family I | I-1  | CM       | 66     |     | M | deceased |
|          | II-1 | UM       | 44     | mut | F | deceased |
| family J | I-1  | UM; Lung | 53; 53 | mut | F | alive    |
|          | I-2  | CM; RCC  | 45; 53 | mut | M | alive    |
|          | I-3  | RCC      | 33     |     | F | alive    |
|          | I-4  | MPM      | NA     |     | M | alive    |
|          | I-5  | no       |        |     | M | alive    |
|          | I-6  | no       |        |     | M | alive    |
|          | I-7  | no       |        |     | F | alive    |
|          | I-8  | no       |        |     | M | alive    |
| family K | I-1  | CM       | 58     |     | F | deceased |
|          | II-1 | CM       | 47; 52 | mut | F | alive    |
|          | II-2 | MPM      | 38     |     | M | alive    |
|          | II-3 | RCC      | 34     |     | M | deceased |
|          | II-4 | UM       | 42     |     | F | deceased |
|          | II-5 | no       |        |     | F | alive    |
|          | II-6 | CM       | 55     |     | M | alive    |
|          | II-7 | no       |        |     | M | alive    |
|          | II-8 | no       |        |     | F | alive    |
|          | II-9 | no       |        |     | F | alive    |
| family L | I-1  | UM       | 39     |     | F | deceased |
|          | I-2  | Prostate | 63     |     | M | alive    |
|          | II-1 | CM       | 47     | mut | M | alive    |
|          | II-2 | no       |        |     | M | alive    |

UM, uveal melanoma; CM, cutaneous melanoma; RCC, renal cell carcinoma; MPM, malignant pleural mesothelioma; no, no cancer reported; NA, not available. Age of onset is indicated in years. *BAP1* status: *BAP1* gene mutational status is indicated when biological sample available. mut: deleterious mutation; wt: wild-type.

**Table S10. Estimation of lifetime risk for RCC in BAP1 mutated families**

|         | Number of individuals in the cohort | RCC in BAP1 mutated families | Lifetime risk of RCC <sup>a</sup> | P value binomial test <sup>b</sup> | 95% CI    | Risk  | Relative risk |
|---------|-------------------------------------|------------------------------|-----------------------------------|------------------------------------|-----------|-------|---------------|
| Male    | 36                                  | 5                            | 0.0056                            | $<10^{-4}$                         | 0.023-0.2 | 0.085 | ~15           |
| Female  | 45                                  | 4                            | 0.0021                            | $<10^{-7}$                         | 0.04-0.28 | 0.13  | ~59           |
| Unknown | 2                                   | 0                            |                                   |                                    |           |       |               |

<sup>a</sup>Lifetime risk of renal cell carcinoma (RCC) in the French population estimated for women and men from (Belot A, 2008)

<sup>b</sup>Probability to have 5 and 4 RCCs by the age of 90 in the male and female cohorts, respectively.

## References

- Belot A, G. P. (2008). Cancer incidence and mortality in France over the period 1980-2005. *Rev Epidemiol Sante Publique*, 56:159-175.
- Houdayer C, M. V.-L. (2010). Enhanced mismatch mutation analysis: simultaneous detection of point mutations and large scale rearrangements by capillary electrophoresis, application to BRCA1 and BRCA2. *Methods Mol Biol*, 653:147-180.
- Li H, H. B. (2009). The Sequence Alignment/Map format and SAMtools. *Bioinformatics*, 25:2078-2079.
- Némati F, S.-G. X.-N.-R. (2010). Establishment and characterization of a panel of human uveal melanoma xenografts derived from primary and/or metastatic tumors. *Clin Cancer Res*, 16(14):3807.
- Popova T, M. E.-L. (2009). Genome Alteration Print (GAP): a tool to visualize and mine complex cancer genomic profiles obtained by SNP arrays. *Genome Biol*, 10:R128.
